# Supplementary material for: Serum CYR61 Is Associated With Airway Inflammation and Is a Potential Biomarker for Severity in Chronic Obstructive Pulmonary Disease
Source: Front Med (Lausanne). 2021 Nov 30;8:781596. doi: 10.3389/fmed.2021.781596 (PMC8669148; doi:10.3389/fmed.2021.781596)
Supplement: Supplementary file 3 [file Data_Sheet_2.ZIP]

Archive with 15 entries (12 files):
- NF-a╩B/
- NF-a╩B/COPD/
- NF-a╩B/COPD/1.tif
- NF-a╩B/COPD/2.tif
- NF-a╩B/COPD/3.tif
- NF-a╩B/COPD/4.tif
- NF-a╩B/COPD/5.tif
- NF-a╩B/COPD/6.tif
- NF-a╩B/COPD/7.tif
- NF-a╩B/COPD/8.tif
- NF-a╩B/COPD/9.tif
- NF-a╩B/Control/
- NF-a╩B/Control/1.tif
- NF-a╩B/Control/2.tif
- NF-a╩B/Control/3.tif
